1 **Effects of Xiantao sewage treatment on microbial**  
2 **community structure of shallow groundwater in**  
3 **wetland**

4 Shu-Fen Song<sup>1</sup> Xiu-Fang Gao<sup>2\*</sup> Fan Yang<sup>3</sup>

5 <sup>1</sup>(College of Life Science, Yangtze University, Jingzhou, Hubei 434025, China)

6 <sup>2\*</sup>(College of resources and Environment, Yangtze University, Wuhan, Hubei  
7 430000, China)

8 <sup>3</sup>(Wuhan Yihui far Biotechnology Co. Ltd, Wuhan, Hubei 430000, China)

9 **Address :Yangtze University, Wuhan, Hubei, China**

10 **(Tel) : +86-13212719979**

11 **(Fax) : +86-0716-8066257**

12 **(E-mail) : gxf2017@yangtzeu.edu.cn**

13 **Abstract**

14 In order to solve the problem of urban domestic sewage treated by semi natural  
15 wetland method with high connectivity between surface water and underground water  
16 in the flood diversion channel, Whether there is a blank study on the pollution of  
17 shallow groundwater. The community structure and abundances of COD<sub>Cr</sub>, total  
18 nitrogen, total phosphorus and microorganism were added to the surface water.  
19 Environmental factors such as COD<sub>Cr</sub>, TN, TP, NH<sub>4</sub><sup>+</sup>-N and microbial community and  
20 abundance indices were monitored through surface water and groundwater. In this  
21 study, physical and chemical indicators, microbial diversity and community structure

22 of 12 water samples from Xiantao artificial wetland were studied by using the  
23 Illumina Miseq sequencing technique and the resulting microbial data were  
24 statistically analyzed in combination with environmental variables. The results  
25 showed that COD<sub>Cr</sub> concentration had a very significant positive correlation with total  
26 microbial communities ( $r=0.530$ ,  $P<0.01$ ), NH<sub>4</sub><sup>+</sup>-N and TN were significantly  
27 positively correlated ( $r=0.337$  and  $0.325$ ,  $P<0.05$ ). In addition, COD<sub>Cr</sub> concentration  
28 was highly positively correlated with abundant groups ( $r=0.520$ ,  $P<0.05$ ), NH<sub>4</sub><sup>+</sup>-N and  
29 TN were significantly positively correlated ( $r=0.325$  and  $0.304$ ,  $P<0.05$ ). For rare taxa,  
30 they might be more sensitive to the environment than their abundant groups. The  
31 relative abundance of the rare group is 0 at the depth of 10m, so we should carefully  
32 evaluate microbial reaction (rare group) environmental conditions in the future.

33 **Key world:** Wetland method, shallow groundwater, microorganism, diversity

## 34 **Introduce**

35 In recent years, the crisis in China's groundwater has been highly concerned by the  
36 international community. In July 15, 2010, the News edition of the Nature<sup>1</sup> magazine  
37 covered the whole page of the groundwater crisis in China (Qiu, 2010). In some areas,  
38 the storage of groundwater is decreasing at an alarming rate, and 90% of the water in  
39 the country has been polluted in varying degrees, of which 60% are seriously  
40 polluted.

41 According to the survey, in addition to landfill and gas station, urban sewage,  
42 industrial wastewater and agricultural wastewater from some large farms are also  
43 polluting in China's urban groundwater (Xu, 2012). Some industrial and mining  
44 enterprises and large farms, driven by economic benefits, try to drain the sewage into  
45 the underground and think that the polluted water is "safe". In fact, shallow

46 groundwater and deep groundwater are only a relative concept, the distribution of  
47 groundwater is not uniform, and the absolute aquifers are not. The shallow  
48 groundwater and deep water are interconnected in many places, so the shallow  
49 groundwater will naturally flow into the deep layer.

50 Artificial wetland is an ecological wastewater treatment technology a new type of  
51 environmental protection (Yin, 2007), It has been successfully applied to storm flood,  
52 domestic sewage and eutrophication water purification (Kobayashi, *et al.*, 2009;  
53 Iasur-Kruh, *et al.*, 2010; Peralta, *et al.*, 2012; Sánchez-Carrillo, *et al.*, 2014).

54 The first example is to use the unused spillway semi natural wetland for urban  
55 sewage treatment, and the Xiantao wetland wastewater treatment plant system is made  
56 using the high water level surface water and the high connectivity water system of the  
57 groundwater. There are few studies on the influence of sewage treatment on  
58 groundwater by artificial wetland. The community and abundance of microbes in  
59 shallow groundwater under this condition, especially the effect of the cumulative  
60 results of pollutants on the groundwater under the long-term treatment conditions is  
61 almost not. The comprehensive study on the utilization of unused spillways, the  
62 treatment of domestic sewage by semi natural wetland, wetland method, the  
63 community and abundance of microbes in groundwater, the contamination of  
64 groundwater, the community and abundance of microbes in groundwater and the  
65 environmental factors of groundwater are the blank. The microbial diversity of  
66 surface water is one of the most important branches of water environment (Fu, *et al.*,  
67 2017; Guo, 2010). The physical and chemical properties of surface water vary with the  
68 conditions of space and light. However, the distribution of microorganisms in shallow  
69 groundwater under different depths is also a very important research topic. In this

70 study, the samples not only have a wide range of samples, but also select three depths  
71 of 0.2m, 5M and 10m in the vertical direction. The community structure and  
72 abundance index of COD<sub>Cr</sub>, total nitrogen, total phosphorus and microbes are added to  
73 the surface water, and the environmental factors of surface water and groundwater  
74 (such as COD<sub>Cr</sub>, TN, TP, NH<sub>4</sub><sup>+</sup>-N) and high throughput sequencing are monitored.  
75 Methods the microbial diversity was analyzed, and the structure and composition of  
76 microbial community in the shallow groundwater of domestic sewage, the  
77 relationship between the microbial community and the environmental factors were  
78 carried out by the wetland method. It can reflect the influence of the microbial  
79 community in the shallow groundwater during the operation of the wetland, and the  
80 correlation between the microbial community and the abundance change and the  
81 pollution level of the organic matter in the groundwater can provide the follow-up  
82 workers with the corresponding theoretical and practical support.

## 83 **1. Materials and Methods**

### 84 **1.1 Introduction of Xiantao wetland method for domestic sewage treatment test**

85 The Xiantao wetland experimental base is introduced in detail and the sampling  
86 azimuth reference Song (Song *et al.*, 2015).

### 87 **1.2 Determination of sampling and environmental factors of water samples**

88 Methods of sampling and environmental factor determination refer to Song (Song *et*  
89 *al.*, 2015).

### 90 **1.3 Sequencing analyses**

91 The processing method of raw data is obtained by referring to Song (Song *et al.*,  
92 2015).

## 93 2. Results

### 94 2.1 Analysis of physical and chemical indexes of wastewater.

95 According to the state regulations, the treated sewage should reach the standard of  
96 pollutant discharge of GB 18918-2002 «municipal wastewater treatment plant»,  
97 M1(400m) and M4(600m) were high concentration( $\text{COD}_{\text{Cr}} > 120\text{mg/L}$ ); M7(3000m)  
98 had achieved the two level standard of «municipal wastewater treatment plant»( $100$   
99  $\text{mg/L} < \text{COD}_{\text{Cr}} < 120 \text{mg/L}$ ); and M2, M3, M5, M6, M8 and M9 were reach the first  
100 level standard ( $\text{COD}_{\text{Cr}} < 50 \text{g/L}$ ). The TP of these samples were  $0.02 - 5.14\text{mg/L}$ , very  
101 significant positive correlation with  $\text{COD}_{\text{Cr}}$  ( $r=0.984$ ,  $P<0.0001$ ). Samples  $\text{NH}_4^+\text{-N}$   
102 contents were  $0.49-8.81\text{mg/L}$ , very significant positive correlation with  $\text{COD}_{\text{Cr}}$  ( $r$   
103  $=0.987$ ,  $P<0.0001$ ). Samples TN contents were  $1.13-19.17\text{mg/L}$ , very significant  
104 positive correlation with  $\text{COD}_{\text{Cr}}$  ( $r =0.983$ ,  $P<0.0001$ ) (**Table 1**). As can be seen from  
105 table 1, along with the level of wetland before treatment, the environmental factors  
106 gradually decreased. There is no phosphorus in the groundwater quality standard  
107 (GB/T 14848-2017). It is generally believed that the concentration of phosphorus in  
108 the groundwater is very low, but the phosphorus in the groundwater is present, and the  
109 amount of the phosphorus is large, and the pollution of phosphorus can not be ignored.  
110 The characteristics of the highly connected water system of surface water and  
111 groundwater are fully reflected here. From the surface water to the vertical direction  
112 of groundwater, that is, from surface water, groundwater depth of 5 meters, and buried  
113 depth of 10 meters, the environmental factors index is also gradually decreasing.  
114 But from the horizontal direction of the wetland in the depth of 5 meters and 10  
115 meters, the reduction is different.

### 116 2.2. Microbial diversity of the researched constructed wetland

117 A total of 80524 high-quality sequences with 5755-24785 sequences (mean=13454)  
118 and 726.9-1077.1 OTUs (mean=855) for twelve water samples were obtained. the  
119 diversity index, including Shannon (4.9-6.0), phylogenetic distance of a whole  
120 tree(48.1-68.5), and Chao 1 (2243.8–3291.9). All the calculated diversity indices in  
121 this study decreased with geographical position variation of azimuth of the studied  
122 samples (**Table 2**). The dominant phyla (the relative abundance of more than 1%) in  
123 the studied samples were *Proteobacteria*, *Bacteroidetes*, *Actinobacteria*,  
124 *Cyanobacteria*, *Verrucomicrobia*, *Firmicutes*, *Acidobacteria*, *Chloroflex* and  
125 *Euryarchaeota* (**Figure 1**). *Proteobacteria* is the most abundant phylum (more than  
126 84% of total sequence reads).

127 Among the retrieved OTUs, a total of 8-20 OTUs were classified as abundant  
128 OTUs. These abundant OTUs accounted for 5.63-15.15% of total OTUs and  
129 represented 64.66-80.85% relative abundance of sequence reads in the studied  
130 samples. In contrast, a total of 0-139 rare species were identified and they accounted  
131 for 0-64.19% of total OTUs and 0-6.98% relative abundance of sequence reads in the  
132 studied samples (**Table 3**). Most abundant OTUs belonged to *Proteobacteria* and  
133 *Bacteroidetes*, which the abundant OTUs accounted for 29.61-72.66% and 0-38.5% of  
134 total sequence reads in the studied samples (**Table 4**).

135 The studied shows that the water samples with similar physical and chemical tests  
136 have similar patterns of microbial structure. For example, cluster analysis revealed  
137 that the 12 samples are aggregated into two large clusters, of which the wetland  
138 surface water samples (M1, M4 and M7) are clustered into one cluster. The 5m deep  
139 and 10m deep water samples are divided into one cluster (except M9) (**Figure 2**). The  
140 horizontal direction Surface water of groundwater in Constructed Wetlands (MC1, M1,  
141 M4 and M7) were dominated by sequences affiliated with *Betaproteobacteria*,

142 *Gammaproteobacteria*, *Epsilonproteobacteria*, *Actinobacteria*. The depth is 5 meters  
143 (MC2, M2, M5, and M8) were dominated by sequences affiliated with  
144 *Betaproteobacteria*, *Gammaproteobacteria*, *Bacteroidia*, *Melainabacteria*,  
145 *Sphingobacteriia*. The depth is 10 meters (MC3, M3, M6 and M9) were dominated by  
146 *Betaproteobacteria*, *Bacilli*, *Gammaproteobacteria*, *Alphaproteobacteria*,  
147 *Flavobacteriia*, *Sphingobacteriia*. the vertical of 400m (M1, M2 and M3) were  
148 dominated by sequences affiliated with *Betaproteobacteria*. 600m (M4, M5 and M6)  
149 were dominated by sequences affiliated with *Betaproteobacteria*, *Bacilli*,  
150 *Gammaproteobacteria*, *Alphaproteobacteria*, *Sphingobacteriia*. 3000m(M7, M8 and  
151 M9)were dominated by sequences affiliated with *Betaproteobacteria*,  
152 *Gammaproteobacteria*, *Flavobacteriia*, *Epsilonproteobacteria*, *Melainabacteria*,  
153 *Sphingobacteriia*. The contrast samples(MC1, MC2 and MC3) were dominated by  
154 *Betaproteobacteria*, *Gammaproteobacteria*, *Bacteroidia*, *Actinobacteria* (**Table 5**).

### 155 **2.3 Statistical analyses.**

156 Statistical analyses further corroborated the influence of different positions on the  
157 structure of community in the studied samples. Mantel test showed that structure of  
158 community of the treatment of surface water from domestic sewage by wetland  
159 method was correlated ( $P<0.01$ ) with  $COD_{cr}$ ( $r=0.520$ ) (**Table 6**). Furthermore,  
160 Bray-Curtis similarity of abundant microbial communities were significantly  
161 correlated ( $r=0.530$ ) with treatment of surface water from domestic sewage by  
162 wetland method (**Figure 3**). Likewise, Mantel test indicated that the abundant  
163 structure of community were great significantly correlated to  $COD_{cr}$ ( $r=0.530$ )(**Table**  
164 **6**). In addition, Mantel tests also showed that three other indicators the total and  
165 abundant structure of community were significantly correlated with  $NH_4^+-N$ ( $r=0.325$

166 and  $r=0.337$ ), TN( $r=0.304$  and  $r= 0.325$ ) (**Table 6**).

### 167 **3. Discussion**

168 The interaction of surface and groundwater covering almost in the process of water  
169 circulation, rainfall (Vidal, *et al.*, 2008), interception (Schellekens, 2000), evaporation  
170 (Zhang, *et al.*, 2008), infiltration (Yimer, *et al.*, 2008), mathematical simulation and  
171 physical processes, and filtration (Fukada, *et al.*, 2008), pollutants migration  
172 (Willhelm, *et al.*, 1996) and other chemical processes, biological processes and the  
173 main contents of the study appear in the review article or some aspects of  
174 bioremediation for pollution.

175 In constructed wetlands, the removal of pollutants is mainly done through the  
176 physical, chemical and biological synergies of the matrix, microbes and plants in the  
177 wetland (Babatunde, *et al.*, 2008). It is generally believed that biological action is the  
178 core factor of sewage purification in artificial wetland (Liang, *et al.*, 2003). Some  
179 scholars through soil column simulation test, the effect of underground infiltration  
180 system on pollutant removal in sewage has been studied (Lance, *et al.*, 1980). The  
181 results also confirm that the main removal effect in underground percolation system is  
182 biological action.

183 Combined with artificial wetland, the changes of microbial community in shallow  
184 groundwater in artificial wetland in the process of habitat restoration were compared  
185 and analyzed. It is found that geographical location is an important factor affecting the  
186 microbial diversity and community structure of the lake surface sediments. This  
187 finding is consistent with recent studies. Some scholars found that the number of  
188 microbes in fine sand decreased with the increase of sand depth (Liu, 2014). Some  
189 scholars found that the number of bacteria and fungi on the surface of the system was



190 significantly higher than that of the lower layer. As the vertical height of the system  
191 deepened, the number of fungi decreased gradually (Zhou, *et al.*, 2009). The total  
192 trend of bacteria and nitrite in the vertical direction is decreasing, and the number of  
193 microbes in the upper layer is more than that in the lower layer. The overall trend of  
194 bacteria and nitrite in the direction of water flow is also decreasing, that is, the front  
195 part is more than the middle and posterior parts (Fu, *et al.*, 2005). Some scholars  
196 pointed out that in the same vertical subsurface flow wetland system, planting  
197 different plants also had an impact on the microbial community in the wetland, but  
198 they only had a significant impact on the 0~10 cm surface of the system, and the  
199 deeper microbial communities were basically similar (Sleytr, *et al.*, 2009). In addition,  
200 in this study, experiments showed that the total microbial community structure was  
201 also significantly related to the  $\text{NH}_4^+\text{-N}$  and TN values of wetland, but lower than the  
202 correlation coefficient of  $\text{COD}_{\text{cr}}$  ( $r = 0.337, 0.325$  VS  $R = 0.530$ , Table 6).

203 It is noteworthy that M9 and wetland surface water samples (M1, M4, M7), M6 and  
204 M8, M2, M3 and M5 three groups of samples gathered separately (**Figure 2**),  
205 indicating that some similar microorganisms may be shared between polluted area and  
206 water purification area. The reason for this phenomenon is that the concentration of  
207 pollutants in the surface water samples is too high to show the eutrophication state.  
208 Therefore, the number of microbes is large, and the concentration of pollutants  
209 decreases with the depth and direction of flow, and the nutrients are less, so the  
210 number of microbes is less.

211 It is also notable that the relative abundance of rare and abundant species of high  
212 surface water in the surface water treated in this study is less than that in the target  
213 area (**Table 3 and 4**), The rare communities showed more obvious reaction than the  
214 rich communities (which were proved by larger relative abundance), which indicated

215 that rare taxa might have more restrictive distribution than the rich groups. Abundant  
216 groups can make use of abundant resources, thus having a very low probability of  
217 extinction and high probability of propagation. In addition, rare taxa may have less  
218 suitable niches in the 10m buried area, which are more vulnerable to environmental  
219 conditions than abundant taxa. Therefore, rare taxa may be responsive more  
220 sensitively to other environmental conditions than other rich taxa.

221 From the above research results, it can be seen that the geographical location is the  
222 most important factor affecting the microbial diversity and structure, whether it is a  
223 rich or rare community in the fairy peach artificial wetland. Rare groups are more  
224 sensitive to geographical location (possibly including other environmental conditions)  
225 than their abundant species.

## 226 **Acknowledgements**

227 This research was supported by grants from the National Natural Science Foundation  
228 of China (Grant No. 41371464), Supported by the study abroad fund of Yangtze  
229 University.

230 We are very grateful to Professor He Ji Zheng of the Chinese Academy of Sciences,  
231 the center for ecological environment research.

## 232 **References**

233 **Babatunde, A.O., Zhao, Y.Q., O'Neill, M. and O'Sullivan B.** 2008. Constructed  
234 wetlands for environmental pollution control: a review of developments, research and  
235 practice in Ireland. *Environ. Int.* **34**, 116-126.

236 **Fu, R.B., Yang, H.Z., Gu, G.W. and Zhang, Z.** 2005. Analysis of substrate  
237 microorganisms status in constructed wetlands and their correlation with pollutants  
238 removal for wastewater treatment. *Res. Environ. Sci.* **18**, 44-49.

- 239 **Fu, X.H., Liu, G.N., He, J.L., Ma, Y.Q., Song, X.K., Meng, L. and Jia, Q.M.** 2017.  
240 Analysis of microbial community diversity in the Bohai Sea marine protected areas of  
241 the Shandong Province. *Mar. Sci.* **41**, 39-47.
- 242 **Fukada, T., Hiscock, K.M., Dennis, P.F. and Grischek, T.** 2003. A dual isotope  
243 approach to identify denitrification in groundwater at a river-bank infiltration site.  
244 *Water. Res.* **37**, 3070-3078.
- 245 **Guo, C.** 2010. Thesis. Nanjing Agricultural University, Jiangsu, Nanjing, China.
- 246 **Iasur-Kruh, L., Hadar, Y., Milstein, D., Gasith, A. and Minz, D.** 2010. Microbial  
247 population and activity in wetland microcosms constructed for improving treated  
248 municipal wastewater. *Microb. Ecol.* **59**, 700-709.
- 249 **Kobayashi, T., Ryder, D.S., Gordon, G., Shannon, I., Ingleton, T., Carpenter, M.**  
250 **and Jacobs, S.J.** 2009. Short-term response of nutrients, carbon and planktonic  
251 microbial communities to floodplain wetland inundation. *Aquat. Ecol.* **43**, 843-858.
- 252 **Lance, J.C., Rice, R.C. and Gilbert, R.G.** 1980. Renovation of wastewater by soil  
253 columns flooded with Primary effluent. *Water. Pollut. Control. Federation.* **52**,  
254 381-388.
- 255 **Liang, W., Wu, Z.B., Cheng, S.P., Zhou, Q.H. and Hu, H.Y.** 2003. Roles of  
256 substrate microorganisms and urease activities in wastewater purification in a  
257 constructed wetland system. *Ecol. Eng.* **21**, 191-195.
- 258 **Liu, L.L.** 2014. Thesis. Xi'an University of Architecture and Technology, Shanxi,  
259 Xi'an, China.
- 260 **Peralta, A.L., Matthews, J.W., Flanagan, D.N. and Kent, A.D.** 2012.  
261 Environmental factors at dissimilar spatial scales influence plant and microbial  
262 communities in restored wetlands. *Wetlands.* **32**, 1125-1134.
- 263 **Qiu, Jane.** 2010. China faces up to groundwater crisis. *Nature.* **466**, 308-308.
- 264 **Sánchez-Carrillo, S., Reddy, K.R., Inglett, K.S. Álvarez-Cobelas, M. and**  
265 **Sánchez-Andrés R.** 2014. Biogeochemical indicators of nutrient enrichments in

- 266 wetlands: the microbial response as a sensitive indicator of wetland eutrophication, pp.  
267 203-222. Abid A. Ansari, *Eutrophication: Causes, Consequences and Control-2014*,  
268 Springer Science+Business Media Dordrecht, Netherlands, Germany.
- 269 **Schellekens J.** 2000. The interception and runoff generating processes in the bisle  
270 catchment, luquillo experimental forest, Puerto Rico. *Phys. Chem. Earth. Part. B.*  
271 *Hydrol. Oceans. Atmos.* **25**, 659-664.
- 272 **Sleytr, K., Tietz, A., Langergraber. G., Haberl, R. and Sessitsch, A.** 2009.  
273 Diversity of abundant bacteria in subsurface vertical flow constructed wetlands. *Ecol.*  
274 *Eng.* **35**, 1021-1025.
- 275 **Song, S.F., Yang, F., Ma, L.A. and Gao, X.F.** 2018. Effects of sewage treatment on  
276 microbial community structure of surface water in Xiantao wetland. *OALib.* **5**, e4583.
- 277 **Vidal, J.P. and Wade, S.D.** 2008. Multimodel projections of catchment-scale  
278 precipitation regime. *J. Hydrol.* **353**, 143-158.
- 279 **Willhelm, S.R., Schiff, S.L. and Robertson, W.D.** 1996. Biochemical evolution of  
280 domestic waste water in septic systems: 2. Application of conceptual model in sandy  
281 aquifers. *Ground. Water.* **34**, 853-864.
- 282 **Xu, Z.Z.** 2012. Thesis. Shanghai Jiao Tong University, Shanghai, Shanghai, China.
- 283 **Yang, J., Ma, L.A., Jiang, H.C., Wu, G. and Dong, H.** 2016. Salinity shapes  
284 microbial diversity and community structure in surface sediments of the  
285 Qinghai-Tibetan Lakes. *Sci. Rep.* **6**, 25078.
- 286 **Yimer, F., Messing, I., Ledin, S. and Abdelkadir, A.** 2008. Effects of different land  
287 use types on infiltration capacity in a catchment in the highlands of Ethiopia. *Soil. Use.*  
288 *Manage.* **24**, 344-349.
- 289 **Yin, J., Wen, Y. and Zhou, Q.** 2007. Progress of microbial ecology in constructed  
290 wetlands. *Environ. Sci. Technol.* **30**, 108-110.
- 291 **Zhang, Y.Q., Chiew, F.H.S., Zhang, L., Leuning, R. and Cleugh, H.A.** 2008.  
292 Estimating catchment evaporation and runoff using MODIS leaf area index and the

293 Penman-Monteith Equation. *Water Resour. Res.* **44**, 2183-2188.

294 **Zhou, Q.H., He, F., Zhang, L.P., Wang, Y.F. and Wu, Z.B.** 2009. Characteristics of  
295 the microbial communities in the integrated vertical-flow constructed wetlands. *J.*  
296 *Environ. Sci.* 21, 1261-1267.

297

298

299

300

301

302

303

304

305

306

307

308

309

310

311

312

313

314

315

316

317 **Table legends**

318 **Table 1. Detection results of surface water and groundwater in Constructed Wetland.**

| Sample |       | Location      | COD <sub>Cr</sub> (mg/L) | TP (mg/L) | NH <sub>4</sub> <sup>+</sup> -N (mg/L) | TN (mg/L) |
|--------|-------|---------------|--------------------------|-----------|----------------------------------------|-----------|
| MC1    | -2000 | surface water | 38.59                    | 0.04      | 1.96                                   | 2.03      |
| MC2    | -2000 | deep of 5m    | 2.89                     | 0.03      | 1.73                                   | 1.28      |
| MC3    | -2000 | deep of 10m   | 2.37                     | 0.02      | 0.49                                   | 1.13      |
| M1     | 400m  | surface water | 182.53                   | 5.14      | 8.81                                   | 19.17     |
| M2     | 400m  | deep of 5m    | 3.67                     | 0.18      | 1.85                                   | 2.94      |
| M3     | 400m  | deep of 10m   | 3.00                     | 0.05      | 1.14                                   | 1.93      |
| M4     | 600m  | surface water | 151.66                   | 4.98      | 8.43                                   | 16.51     |
| M5     | 600m  | deep of 5m    | 2.94                     | 0.05      | 1.33                                   | 2.87      |
| M6     | 600m  | deep of 10m   | 2.36                     | 0.04      | 1.08                                   | 1.66      |
| M7     | 3000m | surface water | 111.16                   | 3.45      | 6.55                                   | 14.21     |
| M8     | 3000m | deep of 5m    | 2.92                     | 0.04      | 0.96                                   | 1.77      |
| M9     | 3000m | deep of 10m   | 2.25                     | 0.03      | 0.91                                   | 1.39      |

319

320

321

322

323

324

325

326

327

328

329

330

331

332

333

334

335

336 **Table 2. Alpha-diversity of the surface water and groundwater in the studied Xiantao**

337 **constructed wetland.**

| <b>sample</b> | <b>Total reads</b> | <b>Observed OTUs</b> | <b>Simpson</b> | <b>Shannon_ Wiener</b> | <b>PD_whole _tree</b> | <b>Good's Coverage</b> | <b>Chao1</b> |
|---------------|--------------------|----------------------|----------------|------------------------|-----------------------|------------------------|--------------|
| <b>MC1</b>    | 18976              | 802.6                | 0.994          | 8.7                    | 53.5                  | 0.7                    | 2393.2       |
| <b>MC2</b>    | 21167              | 735.1                | 0.972          | 7.8                    | 50.9                  | 0.7                    | 2306.8       |
| <b>MC3</b>    | 16403              | 763.7                | 0.99           | 8.2                    | 57.0                  | 0.7                    | 2336.8       |
| <b>M1</b>     | 8237               | 966.7                | 0.987          | 8.7                    | 59.3                  | 0.6                    | 3055.5       |
| <b>M2</b>     | 11825              | 1077.1               | 0.992          | 9.2                    | 68.5                  | 0.6                    | 3165.8       |
| <b>M3</b>     | 7857               | 1046.8               | 0.991          | 9.0                    | 66.6                  | 0.6                    | 3291.9       |
| <b>M4</b>     | 11839              | 937                  | 0.989          | 8.7                    | 60.8                  | 0.6                    | 2638.8       |

---

|           |       |       |       |     |      |     |        |
|-----------|-------|-------|-------|-----|------|-----|--------|
| <b>M5</b> | 20513 | 897   | 0.993 | 8.8 | 55.3 | 0.6 | 3029.1 |
| <b>M6</b> | 7066  | 848.2 | 0.98  | 8.2 | 55.2 | 0.6 | 2898.5 |
| <b>M7</b> | 24785 | 730.8 | 0.975 | 7.6 | 57.6 | 0.7 | 2535.6 |
| <b>M8</b> | 7030  | 730.4 | 0.977 | 7.7 | 51.7 | 0.7 | 2419.5 |
| <b>M9</b> | 5755  | 726.9 | 0.985 | 8.0 | 48.1 | 0.7 | 2243.8 |

---

338

339

340

341

342

343

344

345

346

347

348

349

350

351

352

353

354



355

356

357 **Table 3. Abundance estimates of the abundant and rare OTUs in the studied surface water**  
358 **and groundwater samples in this study.**

| Sample     | Abundant OTUs                                            |                                     | Rare OTUs                                            |                                 |
|------------|----------------------------------------------------------|-------------------------------------|------------------------------------------------------|---------------------------------|
|            | (Percentage of abundant OTUs/ total OTUs in each sample) | Abundant OTU relative abundance (%) | (Percentage of rare OTUs/ total OTUs in each sample) | Rare OTU relative abundance (%) |
| <b>MC1</b> | 20 (10.05%)                                              | 67.96                               | 92 (46.23%)                                          | 5.27                            |
| <b>MC2</b> | 17 (7.91%)                                               | 77.93                               | 138 (64.19%)                                         | 6.98                            |
| <b>MC3</b> | 16 (9.58%)                                               | 79.76                               | 96 (57.49%)                                          | 5.75                            |
| <b>M1</b>  | 15 (10.42%)                                              | 64.79                               | 0 (0.00%)                                            | 0                               |
| <b>M2</b>  | 8 (5.63%)                                                | 66.82                               | 36 (25.35%)                                          | 3.27                            |
| <b>M3</b>  | 9 (7.69%)                                                | 71.97                               | 0 (0%)                                               | 0                               |
| <b>M4</b>  | 17 (9.29%)                                               | 64.66                               | 37 (20.22%)                                          | 2.47                            |
| <b>M5</b>  | 12 (6.45%)                                               | 73.03                               | 93 (50.00%)                                          | 5.03                            |
| <b>M6</b>  | 13 (11.11%)                                              | 74.34                               | 0 (0.00%)                                            | 0                               |
| <b>M7</b>  | 14 (6.01%)                                               | 74.05                               | 139 (59.66%)                                         | 6.49                            |
| <b>M8</b>  | 12 (12.37%)                                              | 80.85                               | 0 (0.00%)                                            | 0                               |
| <b>M9</b>  | 15 (15.15%)                                              | 78.77                               | 0 (0.00%)                                            | 0                               |

359

360

361

362

363

364

365

366

367

368

369

370

371

372

373

374

375

376 **Table 4. Relative abundance of abundant OTUs within different phyla across the studied**  
377 **samples in this study.**

| <b>Phylum</b> | Proteobacteria | Bacteroidetes | Actinobacteria | Cyanobacteria | Firmicutes | Verrucomicrobia | Chloroflexi | Euryarchaeota |
|---------------|----------------|---------------|----------------|---------------|------------|-----------------|-------------|---------------|
| <b>MC1</b>    | 29.61          | 5.95          | 19.71          | 5.95          | 1.06       | 4.61            | 1.06        | 0.00          |
| <b>MC2</b>    | 63.30          | 14.64         | 0.00           | 0.00          | 0.00       | 0.00            | 0.00        | 0.00          |
| <b>MC3</b>    | 72.66          | 2.15          | 0.00           | 0.00          | 1.29       | 0.00            | 3.66        | 0.00          |
| <b>M1</b>     | 58.21          | 5.05          | 0.00           | 0.00          | 1.53       | 0.00            | 0.00        | 0.00          |
| <b>M2</b>     | 65.37          | 0.00          | 0.00           | 0.00          | 1.45       | 0.00            | 0.00        | 0.00          |
| <b>M3</b>     | 69.71          | 0.00          | 0.00           | 0.00          | 1.16       | 0.00            | 0.00        | 1.10          |
| <b>M4</b>     | 54.80          | 8.39          | 0.00           | 0.00          | 1.47       | 0.00            | 0.00        | 0.00          |

---

|           |       |       |      |       |      |      |      |      |
|-----------|-------|-------|------|-------|------|------|------|------|
| <b>M5</b> | 63.21 | 8.76  | 0.00 | 0.00  | 1.06 | 0.00 | 0.00 | 0.00 |
| <b>M6</b> | 66.31 | 0.00  | 0.00 | 0.00  | 8.03 | 0.00 | 0.00 | 0.00 |
| <b>M7</b> | 66.40 | 6.14  | 0.00 | 0.00  | 1.52 | 0.00 | 0.00 | 0.00 |
| <b>M8</b> | 68.14 | 0.00  | 0.00 | 11.18 | 1.53 | 0.00 | 0.00 | 0.00 |
| <b>M9</b> | 40.24 | 38.53 | 0.00 | 0.00  | 0.00 | 0.00 | 0.00 | 0.00 |

---

378

379

380

381

382

383

384

385

386

387

388

389

390

391

392

393

394

395

396 **Table 5. Relative abundance (%) of top 10 classes in the surface water and groundwater of**  
397 **the studied Xiantao constructed wetland.**

| <b>Top10 classes</b> | <i>Betaproteobacteria</i> | Bacilli | Gamma proteobacteria | Alphaproteobacteria | Flavobacteriia | Epsilon proteobacteria | Bacteroidia | Melainabacteria |
|----------------------|---------------------------|---------|----------------------|---------------------|----------------|------------------------|-------------|-----------------|
| <b>MC1</b>           | 32.58                     | 3.16    | 2.66                 | 5.95                | 5.17           | 0.11                   | 0.13        | 0.13            |
| <b>MC2</b>           | 60.24                     | 1.24    | 7.68                 | 1.42                | 0.56           | 0.13                   | 13.16       | 0.04            |
| <b>MC3</b>           | 44.14                     | 3.53    | 34.38                | 1.91                | 0.51           | 0.09                   | 3.46        | 0.00            |
| <b>M1</b>            | 60.19                     | 2.56    | 9.71                 | 2.78                | 6.25           | 4.94                   | 2.67        | 0.00            |
| <b>M2</b>            | 74.35                     | 1.95    | 4.54                 | 2.72                | 0.86           | 0.32                   | 0.00        | 0.23            |
| <b>M3</b>            | 76.05                     | 2.48    | 5.67                 | 2.04                | 0.83           | 0.33                   | 0.77        | 0.50            |
| <b>M4</b>            | 54.30                     | 2.41    | 10.33                | 2.54                | 7.99           | 6.02                   | 4.95        | 0.07            |
| <b>M5</b>            | 36.31                     | 2.55    | 37.74                | 1.90                | 0.65           | 0.09                   | 0.75        | 0.95            |
| <b>M6</b>            | 27.25                     | 11.42   | 12.55                | 37.70               | 1.64           | 0.34                   | 0.79        | 0.23            |
| <b>M7</b>            | 57.47                     | 1.17    | 3.56                 | 1.59                | 5.70           | 15.50                  | 3.85        | 0.05            |
| <b>M8</b>            | 59.76                     | 3.22    | 13.55                | 4.59                | 0.21           | 0.21                   | 0.00        | 11.18           |
| <b>M9</b>            | 36.13                     | 0.63    | 10.23                | 2.34                | 31.65          | 0.19                   | 2.21        | 0.00            |

398

399

400

401

402

403

404

405

406

407

408

409

410

411

412

413

414

415 **Table 6. Mantel test showing the correlation between structure of community similarity and**  
416 **environment parameters of the studied surface water and groundwater in this study.**

|                                 | Abundant OTUs | All OTUs |
|---------------------------------|---------------|----------|
| COD                             | 0.520**       | 0.530**  |
| TP                              | 0.206         | 0.232    |
| NH <sub>4</sub> <sup>+</sup> -N | 0.325*        | 0.337*   |
| TN                              | 0.304*        | 0.325*   |

417 The Pearson's coefficients were calculated and their significances were tested based on 999 permutations.

418

\*  $P < 0.05$  and \*\*  $P < 0.01$ .

419

420

421

422

423

424

425

426

427

428

429

430

431

432

433

434

435

436

437

438

439

440

441

442

443 **Figure legends**

444 **Figure 1. Bray-Curtis similarity-based cluster analysis (left) of structure of community in the studied**

445 samples and schematic figures (right) showing the frequencies of OTUs affiliated with major phyla in this  
446 study.

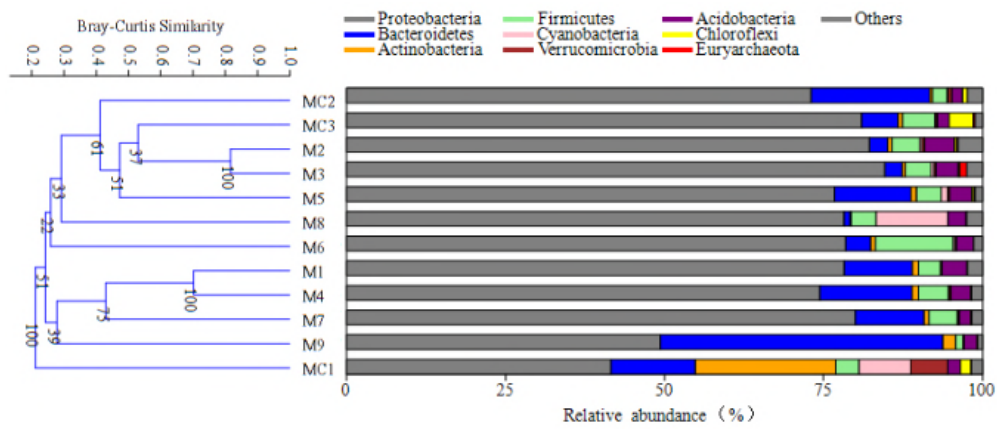

452

453

454

455

456

457

458

459

460

461

462

463

464

465

466

467

468

469

470

471

472

473

474 **Figure 2. Clustering and principal coordinates analysis of total MCC among the studied samples based on**

475 **Bray-Curtis similarity.**

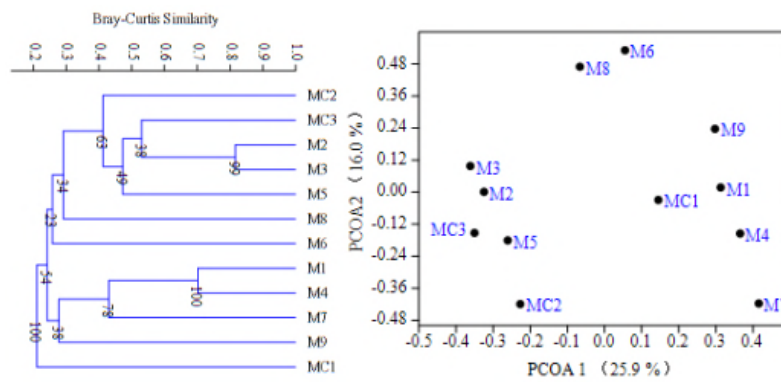

481

482

483

484

485

486

487

488



489

490

491

492

493

494

495

496

497

498

499

500

501

502

503

504

505

506 **Figure 3. Cluster analyses and principal coordinates analyses of abundant structure of community among**

507 **the studied samples based on Bray-Curtis similarity.**

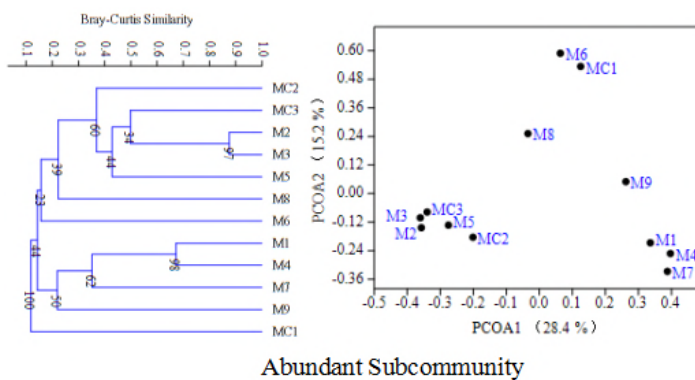

Source: https://www.biorxiv.org/content/10.1101/316802v1.full.pdf
